# Supplementary material
Source: publisher figshare collection journal article supplement (https://gsajournals.figshare.com/ndownloader/files/11109830)
Supplement: Supplementary file 1 [file 11109830]

Table S3 6 SNPs from the 1000 Genomes Project (The 1000 Genomes Project Consortium 2012) located in 5 DHSs

| MHC_DHS Location | | SNP Position | ref | alt | AF | allele frequency of difference population | | | | | human gained TFBS | TFBS position | | TFBS sequence |
| --- | --- | --- | --- | --- | --- | --- | --- | --- | --- | --- | --- | --- | --- | --- |
| EAS | AMR | AFR | EUR | SAS |
| 30063120 | 30063775 | 30063652 | G | C | 0.047 | 0.000 | 0.026 | 0.107 | 0.078 | 0.000 | +V_SOX9_B1 | 30063650 | 30063664 | GGAGAACAATGGAT |
| 30063120 | 30063775 | 30063660 | T | G | 0.320 | 0.181 | 0.255 | 0.509 | 0.178 | 0.399 | +V_SOX9_B1 | 30063650 | 30063664 | GGAGAACAATGGAT |
| 30094800 | 30095910 | 30095625 | G | A | 0.000 | 0.000 | 0.000 | 0.001 | 0.000 | 0.000 | +V_OLF1_01 | 30095612 | 30095634 | CAGAGCTCCCAAGGGGACCGCT |
| 30097545 | 30100218 | 30098504 | G | A | 0.001 | 0.003 | 0.000 | 0.000 | 0.000 | 0.000 | +V_ER_Q6_02 | 30098500 | 30098518 | CAGGTCACTGT |
| 32808378 | 32808930 | 32808696 | G | A | 0.008 | 0.000 | 0.001 | 0.031 | 0.000 | 0.000 | -V_GLI3_01 | 32808694 | 32808705 | CTGGGAGGTCT |
| 33664209 | 33665085 | 33664648 | C | T | 0.012 | 0.013 | 0.003 | 0.002 | 0.001 | 0.043 | -V_BEN_01 | 33664644 | 33664652 | CAGCGGCC |

Note：AF: allele frequency; EAS: East Asian; SAS: South Asian; AFR: African; EUR: European; AMR: American.
